# Supplementary material for: Sporothrix brasiliensis Infection Modulates Antimicrobial Peptides and Stress Management Gene Expression in the Invertebrate Biomodel Galleria mellonella
Source: MDPI journal article supplement (doi:10.3390/jof9111053), 2023-10-27
Supplement: s1 [file s1]

# ***Sporothrix brasiliensis* Infection Modulates Antimicrobial Peptides and Stress Management Gene Expression in the Invertebrate Biomodel *Galleria mellonella***

Nathália Faria Reis <sup>1</sup>, Myrela Conceição Santos de Jesus <sup>1</sup>, Lais Cavalcanti dos Santos Velasco de Souza <sup>1</sup>, Lucas Martins Alcântara <sup>1</sup>, Julia Andrade de Castro Rodrigues <sup>1</sup>, Simone Cristina Pereira Brito <sup>1</sup>, Patrícia de Azambuja Penna <sup>2</sup>, Cecília Stahl Vieira <sup>2</sup>, José Rodrigo Santos Silva <sup>3</sup>, Bruno de Araújo Penna <sup>4</sup>, Ricardo Luiz Dantas Machado <sup>1</sup>, Hector M. Mora-Montes <sup>5</sup> and Andréa Regina de Souza Baptista <sup>1,6,\*</sup>

- <sup>1</sup> Center for Microorganisms' Investigation, Department of Microbiology and Parasitology, Biomedical Institute, Federal Fluminense University, Niterói 24020-141, RJ, Brazil; nathaliafariareis@id.uff.br (N.F.R.); myrelaj@id.uff.br (M.C.S.d.J.); laiscavalcanti@id.uff.br (L.C.d.S.V.d.S.); martins\_lucas@id.uff.br (L.M.A.); julia\_andrade@id.uff.br (J.A.d.C.R.); scpbrito@id.uff.br (S.C.P.B.); ricardomachado@id.uff.br (R.L.D.M.)
- <sup>2</sup> Laboratory of Insect Biology, Federal Fluminense University, Niterói 24220-900, RJ, Brazil; patriciaazambuja@id.uff.br (P.d.A.P.); ceciliastahl@gmail.com (C.S.V.)
- <sup>3</sup> Department of Statistics and Actuarial Sciences, Federal University of Sergipe, São Cristóvão 49107-230, SE, Brazil; rodrigo.ufs@gmail.com
- <sup>4</sup> Laboratory of Gram-Positive Cocci, Biomedical Institute, Fluminense Federal University, Niterói 24020-141, RJ, Brazil; bpenna@id.uff.br
- <sup>5</sup> Department of Biology, Division of Natural and Exact Sciences, Campus Guanajuato, University of Guanajuato, Guanajuato 36050, Mexico; hmora@ugto.mx
- <sup>6</sup> Rede Micologia RJ—Fundação de Amparo à Pesquisa do Estado do Rio de Janeiro (FAPERJ), Rio de Janeiro 21941-630, RJ, Brazil
- \* Correspondence: andrearegina@id.uff.br
-

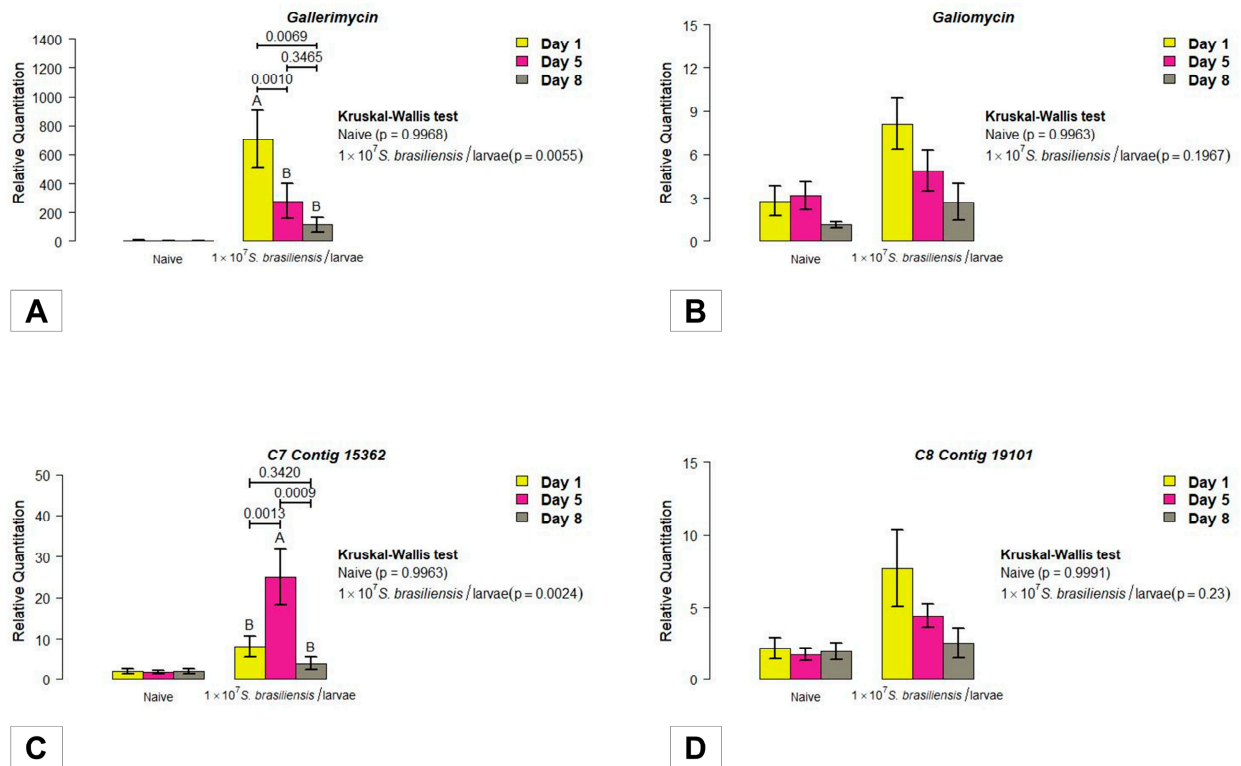

**Figure S1:** Investigation of the gene expression profile of the invertebrate host *Galleria mellonella* in infection by the pathogenic fungus *Sporothrix brasiliensis*. Dynamics of gene expression observed according to day, for each experimental group. (A) *Gallerimycin*, (B) *Galliomycin* and the stress manager genes (C) *C7 Contig 15362* and (D) *C8 Contig 19101*. The units on the Y axis were calculated based on the  $2^{-\Delta\Delta CT}$  method, and are expressed as mean. Each gene was normalized and compared to the expression of control (naive) insects using the  $\beta$ -actin reference gene. The Mann-Whitney test was used to compare the relative quantification of genes and a  $p \leq 0.05$  value was considered significant.
